# Supplementary material for: Health status and morphometrics of Galápagos magnificent frigatebirds (Fregata magnificens magnificens) determined by hematology, biochemistry, blood gas, and physical examination
Source: PeerJ. 2024 Dec 6;12:e18609. doi: 10.7717/peerj.18609 (PMC11627087; doi:10.7717/peerj.18609)
Supplement: Supplemental Information 1 — Details of the various health parameters assayed. [file peerj-12-18609-s001.xlsx]

## Sheet: General.00
Legend			Samples
Species			Morphometrics	Feathers	Uropigial Oil	Blood Slides	Regurgitates	Out of Seabirds2017.01 Sheet
North Seymour
BFB	Blue Footed Boobie (Sula nebouxii)		30	24	18	30	0	22, 25, 33, 35 (Feathers)
GFB	Great Frigate Bird (Fregata minor)		30	21	0	30	10	1 (Feathers)
MFB	Magnificent Frigatebird (Fregata magnificens)		4	4	4	4	1
Daphne Mayor
NZB	Nazca Boobie (Sula granti)		31	20	16	31	8	93
MFB	Magnificent Frigatebird (Fregata magnificens)		6	6	2	6	3
RBTB	Red Billed Tropic Bird (Phaethon aethereus)		31	21	19	31	2	104
South Plaza
STG	Swallow Tailed Gull (Creagrus furcatus)		30	20	0	30	6
Environmental Control					11
Total			162	116	70	162	30
Color Code
Eliminated Extra Sample

## Sheet: Seabirds2017.00
Bird ID				Morphometrics								Physiology				iSTAT																		Manual Pack Cell Volume Values			Manual Total Protein Values				Samples							Sampling Time
ID	Spp.	Reproductive State	Sex	Bill Length (mm)	Bill Depth (mm)	Bill Width (mm)	Extended Bill Length (mm)	Wing Length (cm)	Tarsus Length1 (cm)	Tarsus Length2 (cm)	Weight (g)	Temperature (°C)	Heart Rate (bp 15 secs)	Respiratory Rate (breaths/15 secs)	Lactate (mg/dL)	Temperature (°C)2	pH 1	PCO2 (mmHg)	PO2 (mmHg)	BEecf (mmo l/L)	HCO3 (mmo l/L)	TCO2 (mmo l/L)	SO2%	Temperature 2 (°C)	pH 2	PCO2 (mmHg)2	PO2 (mmHg)3	Na (mmo l/L)	K (mmo l/L)	iCa (mmo l/L)	Glucose (mg/dL)	Hematocrite %PCV	Hemoglobine (via Hct) g/dL	PCV1	PCV2	PCV Average	TP1	TP2	TP Average	Observations PCV Sample	Feathers washed for transport	Uropygial oil labelled	Plasma	Blood Centrifuged	Blood Slides	Regurgitates (Type)	Regurgitates Amount	Capture time	Release Time
1	GFB		M	94.91	20.67	26.76		59.2	40.66		1030	102.4	48	8	4.1																			25	30	27.5	1.3	2.2			Y	N	N	N	2			16:11:00	16:29:00
2	GFB		F	113.74	22.42	28.65		64.5	25.97		1520	104.8	55	6	7.1																			40	41	40.5	4	3.8			Y	N	N	Y	2			16:37:00	16:49:00
3	GFB		M	94.78	22.3	24.59		61.3	23		1120	103.2	42	7	1.7																			42	22		3.2	2.6			Y	N	Y	Y	2			17:07:00	17:22:00
4	BFB	COURTSHIP	M	103.17	27.97	21.15		42	54.62		1430	104.9	61	6	5.6																			22	26		3.8	4.6			Y	Y	N	Y	2			17:12:00	17:31:00
5	GFB		M	98.64	22.39	26.96		62.8	28.36	26.31	1050	103	42	3	2.7																			32	26		3.6	3.8			Y	N	Y	Y	2	Flying fish	1	17:26:00	17:51:00
6	BFB	COURTSHIP	F	111.35	24.24	22.68		45.3	58.57		1340	103.2	50	8	5																			22	16		6	3.4			Y	Y	Y	Y	2			18:00:00	18:18:00
7	GFB	BIG CHICK	F	115.05	25.14	30.19		62.8	20.9	31.9	1660	102.9	53	8	4.2																			20	18		4.8	4.6			Y	N	N	Y	2	Flying fish	1	06:51:00	07:05:00
8	GFB	BIG CHICK	M	102.69	23.18	28.25		62.2	19.68	28.7	1160	101.5	60	5	4.9																			12	25		5.2	5.6			Y	N	Y	Y	2			07:11:00	07:25:00
9	GFB	BIG CHICK	F	109.84	24.36	33.15		62.2	24.88	30.92	1520	102.2	47	8	3.6																			26	30		4.6	4.5			Y	N	N	Y	2			07:35:00	07:49:00
10	GFB		M	95.19	24.87	28.81		60.6	21.07	30.38	1240	101.8	58	5	2.2																			32	32		5.2	5.4			Y	N	Y	Y	2			07:49:00	07:59:00
11	BFB		M	103.47	34.41	36.04		43	55.27		1300	103.5	59	5	3.4																			22	24		4.8	4.8			Y	Y	N	N	2			08:07:00	08:24:00
12	BFB	COURTSHIP	F	101.89	34.19	27.61		41.5	63.26		1200	105.1	57	4	3.3																			32	36		6.2	6.1			Y	Y	N	Y	2			08:37:00	08:52:00
13	GFB		M	94.87	24.99	27.28		56.6	18.72	24.84	1220	103.1	44	6	2.4																			26	28		4.6	4.8			Y	N	Y	Y	2			08:57:00	09:05:00
14	GFB		F	111.86	26.59	27.57		59.9	21.6	30.32	1520	105.1	48	5	4.6																				28		2.8	3			Y	N	N	Y	2			09:11:00	09:23:00
15	BFB		F	105.64	33.77	25.37		42.3	57.6		1340	107.1	58	5	4.8																			22	21		4.6	4.6			Y	Y	N	N	2			09:45:00	10:00:00
16	BFB		F	113.9	33.67	22.29		54.6	61		1850	105.5	57	7	7																			36	40		4.8	4.8			Y	Y	Y	Y	2			10:10:00
17	BFB	EMPTY NEST	F	98.29	28.11	22.21		41.7	57.06		1250	105.6	41	4	2.5																			24	32		5.4	5.4			Y	Y	N	Y	2			10:47:00	10:59:00
18	GFB	BIG CHICK	F	110.16	23.97	27.29		60.7	17.93	23.96	1660	106	56	8	3.8																			26	32		5.6	5.6			Y	N	Y	Y	2	Flying fish	1	11:30:00	11:43:00
19	BFB	EMPTY NEST	F	103.01	29.76	18.38		42.9	63.41		1360	104.2	39	8	3.5																			30	28		5.2	5.2			Y	Y	N	Y	2			15:47:00	16:02:00
20	BFB		M*	106.21	28.42	19.64		43.3	64.79		1240	106.1	72	4	6.3																			30	30		4.3	4.8			Y	Y	N	Y	2			15:51:00	16:06:00
21	BFB		F	106.2	30.27	23.22		44	58.52		2320	104.9	59	11	6.9																			24	28		5.6	5.4			Y	Y	Y	Y	2			16:16:00	16:32:00
22	BFB		M	105.56	27.3	20.76		42.6	56.44		1300	105.3	59	6	3.8																			26	26		5.6	5.2			Y	N	N	Y	2			16:19:00	16:42:00
23	BFB		F	101.65	30.16	23.05		39.1	54.3		1420	104.8	52	6	4.8																			30	24		5.8	5.8			Y	Y	N	Y	2			16:47:00	16:59:00
24	BFB		F	112.19	33.69	22.45		44.4	60.8		2030	103.9	59	7	7.5																			26	32		6.2	6			Y	Y	N	N	2			17:11:00	17:20:00
25	BFB	BIG CHICK	F	113.76	33.43	22.75		45.04	64.56		2300	102.6	69	13	10.2																			28	26		6	5.8			Y	N	N	Y	2			17:20:00	17:32:00
26	BFB	BIG CHICK	M	101.29	28.37	20.86		42.05	55.8		1480	107.1	60	8	5.2																			26	30		5.6	5.4			Y	Y	Y	Y	2			17:34:00	17:45:00
27	BFB	TWO DOWNY CHICK	F	111.31	32.53	21.42		44.02	62.87		1700	103.5	55	6	5.1																			28	26		5.8	5.2			Y	Y	Y	Y	2			07:20:00	07:39:00
28	BFB	BREEDING EGGS	M	106.36	28.01	18.76		43.04	55.05		1320	105.2	50	5	3.2																			18	18		4.6	4.8			Y	Y	Y	Y	2			07:40:00	07:57:00
29	BFB		M	104.24	24.44	18.54		41.07	54.08		1120	102.8	73	4	2																			18	12		5.2	4.6			Y	Y	Y	Y	2			07:51:00	08:07:00
30	BFB	COURTSHIP	F	109.16	33.03	25.29		44.05	62.55		1850	104.1	69	8	5.8																			18	24		8.8	8.8			Y	Y	N	Y	2			08:02:00	08:13:00
31	BFB	COURTSHIP	M	107	28.56	20.92		41.02	61.44		1480	104	65	6	4.8																			20	28		4.8	4.8			Y	Y	Y	Y	2			08:14:00	08:24:00
32	BFB	COURTSHIP	M	105.57	30.77	23.24		40.06	56.77		1360	102.1	63	6	5.4																			22	20		5.4	5.2			Y	N	Y	Y	2			08:24:00	08:38:00
33	BFB	COURTSHIP	M	103.94	30.58	21.79		44.01	61.31		1320	104.6	45	5	2.8																			22	20		5.4	5.4			Y	N	Y	Y	2			08:35:00	08:43:00
34	BFB	COURTSHIP	F	110.6	31.1	22.1		44.03	64.23		1620	103.9	65	6	5.8																			24	18		8.2	8.2			Y	N	Y	Y	2			08:49:00	08:59:00
35	BFB	COURTSHIP	F	105.94	33.58	23.16		42.03	64.48		1130	106	56	12	7.3																			22	20		9.8	9.8			Y	N	N	Y	2			09:02:00	09:12:00
36	BFB	COURTSHIP	M	93.11	28.97	14.03		41.06	42.61		1210	106	84	5	5.1																			34	20		5.4	5.2			N	N	Y	Y	2			09:25:00	09:38:00
37	BFB	BIG CHICK	F	110.09	33.38	23.09		45.02	68.74		1240	103.8	57	7	7.1																			34	30		6	5.8			N	N	Y	Y	2			09:35:00	09:44:00
38	BFB		F	108.14	28.96	22.54		42.02	66.78		1780	103.6	67	4	3.8																			28	28		6.6	6.6			N	N	N	Y	2			10:32:00	10:40:00
39	BFB		M	102.14	30.99	22.67		41.01	52.21		1340	105.2	38	5	4.7																			24	26		5.6	5.6			N	N	Y	Y	2			10:39:00	10:49:00
40	BFB	BIG CHICK	M	104.5	26.96	20.44		42.06	59.52		1230	106.9	50	4	3.8																			22	14		5.2	5			N	N	Y	Y	2			10:51:00	11:00:00
41	BFB	COURTSHIP	M	100.23	30.16	21.49		42	66.66		1360	104.7	87	9	4.9																			24	24		6.4	6.2			N	N	Y	Y	2			15:31:00	15:42:00
42	GFB	BREEDING EGGS	F	111.22	26.99	26.67		59.03	20.18	29.31	1380	100.29	47	5	3.5																			32	30		5.8	5.6			Y	N	Y	Y	2			16:15:00	16:29:00
43	GFB	LITTLE CHICK	M	100.92	23.34	25.2		61	21.59	23.06	1100	105.5	62	5	3.7																			28	32		5.8	5.8			Y	N	Y	Y	2			16:25:00	16:37:00
44	MFB	BIG CHICK	F	126.29	28.29	30.03		68.06	21.31	32.81	1560	106.9	70	8	3.2																			26	32		5.4	5.4			Y	Y	Y	Y	2	Flying fish	1	16:47:00	17:05:00
45	GFB	CHICKBP1	M	103.38	23.46	27.23		58.08	23.36	30.16	1280	105.1	47	7	4.5																			26	24		5	4.8			Y	N	Y	Y	2	Flying fish	1	17:10:00	17:22:00
46	GFB		M	98.93	22.65	26.56		54.08	21.97	22.81	1150	103.3	39	4	4.2																			24	32		5.8	5.8			Y	N	Y	Y	2			17:28:00	17:39:00
47	GFB		M	100.19	24.13	22.33		61.03	24.24	24.29	1250	104.8	50	9	3.9																			28	30		5.2	5.4			Y	N	Y	Y	2			17:31:00	18:00:00
48	GFB		F	106.46	25.8	27.02		60.08	25.73	29.79	1380	104.6	38	5	3.5																			30	38		6.2	6.2			Y	N	Y	Y	2	Flying fish	1	17:52:00	18:02:00
49	GFB	NONBREEDIND	M	93.82	22.29	28.61		42.02	22.22	29.06	1360	104.6	49	8	4.6																			28	32		6.2	6.2			Y	N	Y	Y	2	Flying fish	1	17:54:00	18:07:00
50	GFB	NONBREEDIND	M	99.94	26.93	27.58		57.06	23.07	29.82	1260	102.2	54	6	4.3																			26	26		5.8	5.6			Y	N	Y	Y	2	Flying fish	1	18:37:00	18:47:00
51	GFB	NONBREEDIND	M	104.3	27.61	23.99		61.05	19.37	24.36	1360	103.1	37	5	2.5																			16	24		5.4	4.8			Y	N	Y	Y	2	Flying fish	1	06:44:00	06:55:00
52	GFB	NONBREEDIND	F	103.69	25.05	30.09		62.05	24.99	33.98	1560	103.3	47	7	3.3																			22	26		5.2	4.8			Y	N	Y	Y	2			06:51:00	07:03:00
53	GFB	NONBREEDIND	F	101.74	25.18	28.33		61.05	19.21	27.54	1640	104.2	46	8	3.7																			28	26		5.6	5.6			N	N	Y	Y	2	Flying fish	1	06:57:00	07:08:00
54	GFB	NONBREEDIND	M	106.07	24.39	27.04		60.03	25.78	31.98	1300	101.8	53	6	2.4																			32	30		5.4	5.2			N	N	Y	Y	2			07:11:00	07:19:00
55	GFB	NONBREEDIND	M	93.86	22.24	29.31		58.09	19.12	28.9	1180	103.3	50	6	3.5																			22	26		5.6	5.4			N	N	Y	Y	2			07:23:00	07:38:00
56	MFB	CHICK TYPE 2	M	112.73	25.23	26.9		65.01	22.23	28.58	980	101.2	70	5	3.5																			26	26		4.8	4.6			Y	Y	N	N	2			07:32:00	07:46:00
57	GFB	NONBREEDIND	M	92.69	20.26	25.99		57.2	24.64	28.71	1100	104.1	54	5	2.2																			34	26		5.8	5.4			N	N	Y	Y	2			08:04:00	08:20:00
58	GFB		M	96.88	22.67	27.78		57.5	23.49	29.43	1140	103	53	8	3.5																			24	20		5	4.8			N	N	Y	Y	2	Flying fish	1	08:17:00	08:27:00
59	GFB		M	96.99	24.64	27.53		57.1	24.2	30.19	1220	104	45	7	2.4																			26	26		4.4	4.4			N	N	Y	Y	2			08:19:00	08:30:00
60	GFB	BP1	F	109.5	22.62	27.05		60.4	26.36	30.48	1280	103.2	56	7	3.6																			32	32		4.2	4.2			N	N	Yx2	Y	2			08:35:00	08:52:00
61	GFB	BP1	F	110.64	24.64	28.54		60.5	22.5	29.93	1440	101.5	45	6	4.2																			22	14		4.8	4.6			N	N	N	Y	2			08:48:00	08:58:00
62	GFB	BJ	F	105.99	25.45	29.46		60.5	24.06	28.91	1420	102.7	44	5	2.7																			22	26		4.8	4.8			N	N	Yx2	Y	2			08:51:00	09:03:00
63	MFB	NESTING	F	103.43	25.48	29.84		68.09	23.32	39.09	1650	107.6	69	16	3.5																			28	28		5.2	4.6			Y	Y	Y	Y	2			09:41:00	09:58:00
64	MFB	BP2	F	129.81	28.38	30		70.05	25.54	33.36	1560	109.3	73	PANTING	6																			26	22		5.2	5.2			Y	Y	Y	Y	2			10:08:00	10:18:00
65	NZB	EMPTY NEST	F	102.66	37.17	23.26		46	59.85		1820	104.3	76	9	5.3																			24	22		5.4	5.4			Y	Y	N	Y	2	Flying fish	1	15:57:00	16:13:00
66	NZB	EMPTY NEST	F	103.16	33.26	26.49		48.07	57.56		2480	102	52	7	6.2																			24	18		9.2	6.2			Y	Y	Y	Y	2			16:04:00	16:18:00
67	NZB	EGG	F	100.09	33.96	25.09		46.08	53.56		2050	104.9	91	8	6.6																			36	30		6	6			Y	Y	Y	Y	2			16:21:00	16:34:00
68	NZB	2EGGS	F	104.63	37.66	24.76		48.01	60.62		2240	105.1	79	9	8.6																			22	14		5.8	6			Y	Y	N	Y	2			16:30:00	16:40:00
69	NZB	COURTSHIP	M	101.07	37.66	24.76		48	52.34		1880	102.4	50	3	5.2																			30	32		6.6	6.2			Y	Y	N	Y	2			16:43:00	16:53:00
70	NZB	FLUFFY	M	97.76	39.04	30.01		44.04	50.96		1720	103.3	47	8	7.3																			16	22		5.4	5.2			Y	N	Y	Y	2			16:52:00	17:05:00
71	NZB	EMPTY NEST	M*	104.04	37.04	25.96		45.04	48.15		1960	104.3	85	8	7																			26	28		5.8	5.8			Y	Y	N	Y	4			17:02:00	17:13:00
72	NZB	LITTLE CHICK	F	102.11	39.11	25.39		46.01	57.03		1940	103.5	50	6	5.8																			34	18		5.8	5.8			Y	Y	Y	Y	2			17:13:00	17:28:00
73	NZB	nesting	M	104.32	38.15	26.38		47.04	65.45		1960	102.5	71	7	6																					24			6.6		Y	Y	Y	Y	2			17:20:00	17:33:00
74	NZB	nesting	F	107.72	36.15	25.18		46.01	62.86		1060	102.6	94	11	5.5																					18			4.9		Y	N	Y	Y	2			08:57:00	09:13:00
75	NZB	egg	F	99.02	34.81	29.59		46.06	58.89		1980	104.6	80	6	4.3																					27			6.6		Y	Y	Y	Y	2			09:17:00	09:31:00
76	NZB	two eggs	F	100.29	33.05	24.54		50.01	74.09		2320	103.2	40	6	5.1																					22			6.4		Y	Y	Y	Y	2			09:31:00	09:47:00
77	NZB	courtship	M?	97.76	36.24	25.39		45.07	63.83		1640	103.9	84	6	4.5																					18			8.4		Y	Y	Y	Y	2			09:47:00	10:02:00
78	NZB	egg	M?	100.06	35.56	25.13		45.2	64.41		1840	103	86	7	6.1																					18			8.6		Y	N	Y	Y	2			10:07:00	10:20:00
79	NZB	two eggs	F	104	38.38	25.81		47.06	62.17		2140	102.2	64	10	4.5																					16			11.3		Y	Y	Y	Y	2			10:19:00	10:26:00
80	NZB	egg	?	98.66	37.11	24.81		47	69		1160	105.9	55	9	7.3																					25			6		Y	Y	Y	Y	2			10:33:00	10:46:00
81	NZB	big chick	M	100.02	31.44	22.12		45.01	61.94		1600	105.1	47	8	4.3																					19			6.3		Y	N	Y	Y	2			10:40:00	10:50:00
82	NZB	two eggs	?	100.54	38.41	24.05		46.49	68.94		1760	106.3	82	7	2.9																					21			6		Y	Y	Y	Y	2			10:58:00	11:00:00
83	NZB	nesting	M	102.08	35.01	23.81		45.03	62.46		1900	102	64	8	5.3																					14			7.5		Y	Y	Y	Y	2			15:20:00	15:31:00
84	NZB	egg	F	108.24	36.23	24.35		48.09	66.01		2290	101.8	86	8	5.4																					21			4.4		Y	Y	Y	Y	2	Needle fish	1	15:34:00	15:44:00
85	NZB	two eggs	?	102.28	34.42	23.22		48.01	63.31		1880	101.3	72	6	2.5																			5		30	3.2		5		N	N	N	Y	2	?	1	15:47:00	15:58:00
86	NZB	empty nest	?	98.76	35.45	25.18		45.02	69.41		1640	105.7	43	9	4.8																			18	18	25	5.4	5.4	4.8		N	N	Y	Y	2			15:56:00	16:03:00
87	NZB	two eggs	F	98.18	33.06	25.04		46.06	69.19		1850	103.8	67	11	4.5																			30	34	22	5.4	5.2	6		N	N	Y	Y	2	Flying fish	1	16:14:00	16:21:00
88	NZB	empty nest	M	102.28	37.68	26.73		48	70.57		2090	102.4	67	6	6.7																			26	26	35	5.8	5.8	5.4		N	N	Y	Y	2			16:18:00	16:24:00
89	NZB	two eggs	F?	107.03	37.4	25.44		47.01	71.13		2220	102.6	83	8	7																			18	18	18	5.2	5	4.2		N	N	Y	Y	2	Flying fish	1	16:26:00	16:37:00
90	NZB	egg	F	100.31	33.34	23.18		46	59.63		2240	104.9	67	7	5.3																			26	28	26	5.8	5.8	6.1		N	N	Y	Y	2	Remora	1	16:33:00	16:43:00
91	NZB	two eggs	F	100.85	36.13	24.84		46.08	61.54		2000	104.3	58	6	4.3																			24	24	24	5	5.2	5.1		N	N	Y	Y	2			16:44:00	16:54:00
92	NZB	two eggs	F	104.03	35.38	23.63		47.07	69.53		2360	103	75	9	8.6																			36	12	24	5.4	5.4	5.4		N	N	Y	Y	2			16:49:00	16:59:00
93	NZB	courtship	M	103.68	24.98	24.38		46	65.53		1780	104.6	46	7	7.1																			18	22	20	5	5	5		N	N	Y	Y	2			16:55:00	17:02:00
94	NZB	egg	M	96.1	34.91	22.23		44.05	70.04		1920	105.7	45	8	4.8																			20	22	21	6	6	6		N	N	Y	Y	2	Remora	1	17:03:00	17:13:00
95	NZB	courtship	M	100.95	33.04	24.67		45.09	67.46		1920	102	85	6	5.3																			16	18	17	5.4	5.2	5.3		N	N	Y	Y	2	Sardine	1	17:07:00	17:17:00
96	RBTB		?	63.9	23.99	11.25		31.07	35.6		600	101.3	62	7	5.5																			28	30	29	9	8.8	8.9		Y	Y	Y	Y	2			07:32:00	07:46:00
97	RBTB	egg	?	69.97	22.22	11.49		32.02	30.95		620	100.9	66	8	3.5																			22	20	21	9.2	7	8.1		Y	Y	Y	Y	2			07:33:00	07:48:00
98	RBTB	courtship	?	60.73	21.86	11.12		39.02	35.91		730	103.8	76	13	4.1																			30	20	25	5	5	5		Y	Y	Y	Y	2			07:49:00	08:02:00
99	RBTB	little chick	?	62.03	22.01	11.62		29.09	28.83		620	103.3	65	6	5.8																			22	36	29	5.6	5.2	5.4		Y	Y	N	Y	2			07:57:00	08:12:00
100	RBTB	empty nest	?	64.06	21.91	10.99		30.07	29.89		500	103.4	53	6	2.6																			16	10	13	9.8	9.6	9.7		Y	Y	Y	Y	2			08:24:00	08:36:00
101	RBTB	egg	?	60.7	21.32	12.15		31.02	21.95		600	103.1	75	8	3.6																			16	18	17	4.8	4.8	4.8		Y	Y	Y	Y	2			08:26:00	08:38:00
102	RBTB	little chick	?	69.96	21.52	12.04		30.05	35.66		610	103.5	55	4	4.7																			24	24	24	5.4	5.4	5.4		Y	Y	Y	Y	2			08:46:00	08:56:00
103	RBTB	egg	?	58.49	22.02	12.21		31.91	38.01		600	103.5	45	4	3.8																			22	24	23	8.6	8.2	8.4		Y	Y	Y	Y	2			08:47:00	09:07:00
104	RBTB	little chick	?	62.06	22.12	12.07		30.9	36.86		600	102	63	7	6.2																			14	3	8.5	5	4.6	4.8		Y	N	N	N	2			09:14:00	09:24:00
105	RBTB		?	58.53	19.94	12.64		31.4	37.75		600	106.9	42	11	2																			22	6	14	5.2	4.8	5		Y	Y	Y	Y	2			09:20:00	09:45:00
106	RBTB		?	64.2	22.79	12.76		31.4	35.09		540	104	50	6	3.6																			32	18	25	4.2	4.6	4.4		Y	Y	Y	Y	2			09:37:00	09:51:00
107	RBTB	egg	?	61.38	21.03	13.48		32.01	39.98		590	100.9	56	4	3.6																			26	20	23	4.8	4.8	4.8		Y	Y	Y	Y	2			10:14:00	10:31:00
108	RBTB	egg	?	63.99	19.56	11.84		30.09	34.93		600	102.9	50	7	5.3																			20	22	21	10.8	10.8	10.8		Y	Y	Y	Y	2			10:22:00	10:35:00
109	RBTB	courtship	?	63.45	20.6	11.59		33.01	33.05		540	104.1	50	6	2.9																			32	30	31	5	5	5		Y	N	N	N	2			10:44:00	10:59:00
110	RBTB		?	65.67	22.52	11.4		32	33.87		600	105.1	55	5	2																			30	30	30	3.8	4	3.9		N	N	Y	Y	2			10:53:00	11:05:00
111	RBTB	big chick	?	60.82	21.44	12.51		31.02	36.04		580	106.3	38	25/panting	5.7																			24	20	22	4	3.6	3.8		N	N	Y	Y	2	Flying fish	1	11:17:00	11:26:00
112	RBTB	chick	?	61.3	19.86	10.67		30.06	30.92		620	102.6	56	12	3.7																			24	22	23	6.4	6.4	6.4		Y	Y	N	Y	2			15:35:00	15:48:00
113	RBTB	empty nest	?	60.94	21.22	11.16		30.06	35.81		580	104.5	45	10	3.4																			18	18	18	5.8	6	5.9		Y	Y	Y	Y	2			15:30:00	15:58:00
114	RBTB		?	64.03	23.21	12.07		33.07	30.05		600	105.1	56	10	3.2																			10	16	13	3.8	3.8	3.8		Y	Y	N	Y	2			15:57:00	16:22:00
115	RBTB	egg	?	62.81	21.14	10.55		31.06	35.33		560	104	54	9	3.9																			24	20	22	9.8	9.6	9.7		Y	Y	Y	Y	2			15:58:00	16:20:00
116	RBTB	big chick	?	61.84	21.81	10.89		31.56	37.78		620	102.9	50	10	2.3																			20	18	19	5.4	5.2	5.3		Y	Y	N	Y	2			16:05:00	16:29:00
117	RBTB	empty nest	?	60.32	21.6	11.05		30.05	33.65		650	104.2	50	15	4.1																				26	26		5.8	5.8		Y	Y	Y	Y	2			16:44:00	16:54:00
118	RBTB	little chick	?	62.55	25.62	12.5		31.04	36.73		580	105.3	36	6	4.6																			24	18	21	5.2	5	5.1		Y	Y	N	Y	2			16:45:00	17:01:00
119	RBTB	little chick	?	60.01	21.02	11.58		29.06	33.34		600	106.9	55	9	2.4																			26	28	27	5.6	5.6	5.6		N	N	Y	Y	2			17:12:00	17:27:00
120	RBTB		?	62.16	21.29	11.58		31.01	33.91		610	103.1	66	9	3																			24	18	21	5.8	6	5.9		N	N	Y	Y	2	Flying fish	1	17:25:00	17:33:00
121	RBTB		?	67.2	22.44	12.73		29.03	33.63		650	100.6	71	6	4.8																			30	20	25	7	7	7		N	N	Y	Y	2			17:36:00	17:46:00
122	RBTB		?	60.3	20.8	10.75		32.06	31.38		630	102.1	60	10	5.1																			16	16	16	5.6	5	5.3		N	N	Y	Y	2			17:41:00	17:51:00
123	RBTB	little chick	?	66.27	21.67	12.83		29.09	38.76		580	102.4	58	7	6																			26	16	21	7	6.8	6.9		N	N	Y	Y	2			17:50:00	18:00:00
124	RBTB	egg	?	67.77	22.61	11.88		32.07	36.01		540	101.3	71	6	6.5																			24	16	20	7	7	7		N	N	Y	Y	2			07:26:00	07:39:00
125	RBTB	little chick	?	62.17	21.13	12.09		31.07	33.82		580	105.9	60	10	5.7																			14	16	15	4.6	4.8	4.7		N	N	Y	Y	2			07:28:00	07:41:00
126	RBTB	egg	?	64.95	21.71	12.03		31.03	35.22		580	103.2	68	8	2.5																			16	20	18	4	3.6	3.8		N	N	Y	Y	2			07:38:00	07:49:00
127	MFB	little chick	M	107.78	23.61	28.23		66.06	24.45	29.7	1180	101.3	69	7	4.1																			28	32	30	5.4	5.6	5.5		Y	Y	Y	Y	2			08:38:00	08:51:00
128	MFB	empty nest	F	102.99	26.62	30.66		70.06	28.69	38.72	1780	102.9	69	6	3.6																			20	20	20	7.2	8	7.6		Y	Y	Y	Y	2	?	1	08:46:00	08:59:00
129	MFB	egg	F	107.77	27.83	29.5		69.06	22.32	33.1	1550	102.5	76	9	4.7																			16	18	17	3.8	4	3.9		Y	N	Y	Y	2			09:23:00	09:36:00
130	MFB	egg	F	106.97	26.09	29.07		69.05	29.18	30.92	1600	102.6	80	5	3.2																			28	26	27	5.8	5.6	5.7		Y	N	N	N	2			09:43:00	10:07:00
131	MFB		F	108.3	27.13	29.9		67.07	25.37	41.2	1260	103.8	81	10	5.8																			20	26	23	5	5	5		Y	N	Y	Y	2	?	2	09:55:00	10:06:00
132	MFB	chick (P1)	M	104.61	24.26	26.21		61.05	29.8	34.11	1140	102.6	81	10	4.9																			34	30	32	4	4.2	4.1		Y	N	Y	Y	2			10:07:00	10:17:00
133	STG	egg	?	54.53	17.53	10.61		39.07	57.82		580	103.8	82	8	3.8																			22	18	20	6	6	6		Y	N	Y	Y	2			16:28:00	16:42:00
134	STG	egg	?	51.58	17	10.85		42.08	62		710	104.4	50	6	3.8																			20	20	20	6.2	6.4	6.3		Y	N	Y	Y	2			16:32:00	16:40:00
135	STG		?	51.58	17.01	11.1		42.01	59.68		580	102.2	54	8	2.1																			20	20	20	4.8		4.8		Y	N	Y	Y	2			16:40:00	16:50:00
136	STG		?	51.57	19.19	12.24		42.04	62.76		690	106.1	62	10	4																			32		32	6		6		Y	N	Y	Y	2			16:44:00	16:57:00
137	STG	egg	?	52.1	16.65	12.35		40.03	59.4		630	101.8	77	7	4.1																			20	22	21	4.6	4.6	4.6		Y	N	Y	Y	2			17:00:00	17:07:00
138	STG		?	52.05	15.4	13		41.03	53.63		630	105.8	59	6	1.9																			20	18	19	4	4	4		Y	N	Y	Y	2			17:01:00	17:14:00
139	STG	courtship	?	55.42	18.22	13.03		42.02	53.24		640	103.1	48	6	0.9																			20	20	20	5.6	5.6	5.6		Y	N	Y	Y	2			17:10:00	17:19:00
140	STG	egg	?	53.71	19.09	13.1		44.01	67.97		640	104.3	82	7	2.9																			28	24	26	5.6	5.8	5.7		Y	N	N	Y	2			17:26:00	17:32:00
141	STG	egg	?	61.35	17.47	11.58		40.03	61.3		610	104.2	61	6	4.3																			18	16	17	6.8	6.8	6.8		Y	N	Y	Y	2			17:33:00	17:44:00
142	STG	courtship	?	50.14	17.86	11.82		42.3	62.73		600	105.5	64	6	1.3																			20	18	19	4.2	4.2	4.2		Y	N	Y	Y	2			17:39:00	17:54:00
143	STG	egg	?	54.97	16.95	12.98		42.06	60.9		660	104.8	79	12	5																			16	20	18	7.2	7	7.1		Y	N	Y	Y	2			17:40:00	17:48:00
144	STG	egg	?	53.39	18.7	12.67		40.01	60.99		720	102.9	47	10	2.4																			22	22	22	4.4	4.4	4.4		Y	N	Y	Y	2			17:52:00	18:01:00
145	STG	empty nest	?	43.35	18.11	12.54	50.8	43.88	61.58		740	102.6	56	8	3.1																			24	24	24	6.6	6.6	6.6		Y	N	Y	Y	2	Flying fish	1	07:36:00	07:45:00
146	STG	nesting	?	35.75	15.44	11.17	49.46	40.09	62.74		660	104.8	77	6	2.8																			18	18	18	5	4.8	4.9		Y	N	Y	Y	2	Flying fish	1	07:40:00	07:50:00
147	STG	egg	?	47.71	15.92	11.52	50.8	40.09	63.62		730	105.3	65	6	5.1																			28	26	27	6.8	6.4	6.6		Y	N	Y	Y	2			07:46:00	07:55:00
148	STG		?	38.33	18.6	13.04	52.62	42.05	62.27		780	105.8	49	9	2.9																			24	20	22	6.2	6.6	6.4		Y	N	N	N	2	Flying fish	1	07:53:00	08:05:00
149	STG		?	36.51	16.1	11.67	46.45	40.06	60.39		670	106.7	73	11	2.6																			16	20	18	8.6	8.2	8.4		Y	N	Y	Y	2	Sardine	1	08:07:00	08:17:00
150	STG		?	36.6	15.91	12.18	52.16	42.08	65.41		610	102.6	47	7	2.6																			18	18	18	8.8	8.4	8.6		Y	N	Y	Y	2			08:25:00	08:33:00
151	STG	courtship	?	30.73	12.06	7.1	43.01	42.08	59.48		740	103.6	64	9	5.8																			14	18	16	11.2	11.4	11.3		Y	N	N	Y	2	Squid	1	08:29:00	08:35:00
152	STG		?	40.42	17.92	13.44	54.14	42.09	64.17		630	106.3	50	8	4.3																			26	24	25	6	6	6		Y	N	Y	Y	2	Squid	1	08:34:00	08:42:00
153	STG		?	47.47	12.39	13.32	47.02	40.8	63.14		650	104.9	80	12	6.3																			16	22	19	6.4	6.2	6.3		N	N	N	N	2			08:47:00	08:58:00
154	STG		?	37.49	16.54	12.16	50.66	42.7	64.76		640	105.2	65	9	3.2																			20	22	21	6	6	6		N	N	N	Y	2			08:48:00	08:56:00
155	STG		?	38.77	11.66	17.11	50.57	40.01	56.97		630	106.1	78	9	3.3																			14	14	14	7.4	7.6	7.5		N	N	Y	Y	2			09:03:00	09:11:00
156	STG		?	40.7	18.38	12.7	52.82	43.08	60.23		720	107	54	10	3.2																			24	18	21	4.2	4.6	4.4		N	N	Y	Y	2			09:04:00	09:14:00
157	STG	big chick	?	37.8	17.79	12.42	53.54	4.02	64.42		610	107.6	61	8	3.4																			30	30	30	5	5	5		N	N	Y	Y	2			09:17:00	09:24:00
158	STG	egg	?	36.78	17.33	11.2	48.66	39.49	59.24		610	104.1	80	9	5.6																			20	30	25	4.8	4.8	4.8		N	N	Y	Y	2			09:25:00	09:33:00
159	STG	courtship	?	39.58	17.22	11.54	54.32	40.07	61.18		580	102.6	68	11	4.1																				22	22		6	6		N	N	Y	Y	2			09:44:00	09:54:00
160	STG		?	36.67	17.07	12.09	52.3	41.02	62.68		590	106.9	81	8	3																			32	38	35	5.2	5.6	5.4		N	N	Y	Y	2			09:50:00	10:00:00
161	STG	courtship	?	35.76	17.11	11.41	48.4	41.02	59.14		630	102	58	10	2.9																			16	20	18	4.2	4.2	4.2		N	N	Y	Y	2			10:21:00	10:31:00
162	STG	courtship	?	38.37	18.13	13.46	52.86	42	65.46		710	105	48	9	2.3																			28	24	26	6.2	6	6.1		N	N	Y	Y	2			10:21:00	10:33:00
	Env-s-1																																									Y
	Env-s-2																																									Y
	Env-s-3																																									Y
[truncated: 4 more columns]

## Sheet: General.01
Legend			Samples
Species			Morphometrics	Feathers	Uropigial Oil	Plasma in Eppendorf for Storage at GSC	Blood in Eppendorf for Storage at GSC	Blood Slides x2	Regurgitates
North Seymour
BFB	Blue Footed Boobie (Sula nebouxii)		30	20	18	16	30	30	0
GFB	Great Frigate Bird (Fregata minor)		30	20	0	25	30	30	10
MFB	Magnificent Frigatebird (Fregata magnificens)		4	4	4	4	4	4	1
Daphne Mayor
NZB	Nazca Boobie (Sula granti)		30	20	17	24	30	30	8
MFB	Magnificent Frigatebird (Fregata magnificens)		6	6	2	6	6	6	3
RBTB	Red Billed Tropic Bird (Phaethon aethereus)		30	20	19	25	29	30	2
South Plaza
STG	Swallow Tailed Gull (Creagrus furcatus)		30	20	0	24	28	30	6
Environmental Control					12
Unknown
Total			160	110	72	124	157	320	30
Note

## Sheet: Mag Frigate Data
Bird ID				Morphometrics									Physiology							ISTAT											Hematology						Manual Pack Cell Volume Values			Manual Total Protein Values				Samples
ID	Spp.	Reproductive State	Sex	Bill Length (mm)	Bill Depth (mm)	Bill Width (mm)	Extended Bill Length (mm)	Wing Length (cm)	Tarsus Length1 (mm)	Tarsus Length2 (mm)	Weight (g)	Weight (Kg)	Temperature (F)	Temperature (°C)	Heart Rate (bp 15 secs)	Heart Rate (bpm)	Respiratory Rate (breaths/15 secs)	Respiratory Rate (bpm)	Lactate (mg/dL)	Na (mmo l/L)	K (mmo l/L)	Cl- (mmo l/L)	iCa (mmo l/L)	TCO2 (mmo l/L)	Glucose (mg/dL)	BUN	CREA	Hematocrite %PCV	Hemoglobine (via Hct) g/dL	AnGap	Lymphocites	Heterophils	Monocites	Eosinophils	Basophils	WBC Estimates	PCV1	PCV2	PCV Average	TP1	TP2	TP Average	Observations PCV Sample	Feathers washed for transport	Uropygial oil labelled	Plasma Stored at Microlab GSC	Blood Centrifuged Stored at Microlab GSC	Blood Slides	Regurgitates (Type)
44	MFB	BIG CHICK	F	126.29	28.29	30.03		68.06	21.31	32.81	1560	1.56	106.9	41.6111	70	280	8	32	3.2	141	4	113	0.99	21	234	3	0.6	39	13.3	12							26	32	29	5.4	5.4	5.4		Y	Y	Y	Y	2	Flying fish
56	MFB	CHICK TYPE 2	M	112.73	25.23	26.9		65.01	22.23	28.58	980	0.98	101.2	38.4444	70	280	5	20	3.5	144	3.8	119	1.01	18	239	<3	<0.2	36	12.2	12							26	26	26	4.8	4.6	4.7		Y	Y	Y	Y	2
63	MFB	NESTING	F	103.43	25.48	29.84		68.09	23.32	39.09	1650	1.65	107.6	42	69	276	16	64	3.5	135	5.2	118	0.7	20	263	<3	<0.2	35	11.9	4							28	28	28	5.2	4.6	4.9		Y	Y	Y	Y	2
64	MFB	BP2	F	129.81	28.38	30		70.05	25.54	33.36	1560	1.56	109.3	42.9444	73	292	PANTING	#VALUE!	6	143	4.6	111	1.02	19	285	3	0.5	38	12.9	18							26	22	24	5.2	5.2	5.2		Y	Y	Y	Y	2
127	MFB	little chick	M	107.78	23.61	28.23		66.06	24.45	29.7	1180	1.18	101.3	38.5	69	276	7	28	4.1	144	3.1	116	0.91	21	231	<3	<0.2	37	12.6	11							28	32	30	5.4	5.6	5.5		Y	Y	Y	Y	2
128	MFB	empty nest	F	102.99	26.62	30.66		70.06	28.69	38.72	1780	1.78	102.9	39.3889	69	276	6	24	3.6	137	2.9	114	1.13	21	246	<3	0.6	36	12.2	6							20	20	20	7.2	8	7.6		Y	Y	Y	Y	2	?
129	MFB	egg	F	107.77	27.83	29.5		69.06	22.32	33.1	1550	1.55	102.5	39.1667	76	304	9	36	4.7	144	3.9	116	0.98	20	229	<3	0	41	13.9	13							16	18	17	3.8	4	3.9		Y	N	Y	Y	2
130	MFB	egg	F	106.97	26.09	29.07		69.05	29.18	30.92	1600	1.6	102.6	39.2222	80	320	5	20	3.2	147	4.5	113	1.21	27	247	<3	<0.2	37	12.6	13							28	26	27	5.8	5.6	5.7		Y	N	Y	Y	2
131	MFB		F	108.3	27.13	29.9		67.07	25.37	41.2	1260	1.26	103.8	39.8889	81	324	10	40	5.8	142	4.3	112	1.02	22	247	4	1	38	12.9	13							20	26	23	5	5	5		Y	N	Y	Y	2	?
132	MFB	chick (P1)	M	104.61	24.26	26.21		61.05	29.8	34.11	1140	1.14	102.6	39.2222	81	324	10	40	4.9	147	4	116	1.09	19	229	<3	<0.2	40	13.6	16							34	30	32	4	4.2	4.1		Y	N	Y	Y	2
	Env-s-1																																												Y
	Env-s-2																																												Y
	Env-s-3																																												Y
	Unknown-8																																												Y
	Unknown-7																																												Y
	Unknown-6																																												Y
	Unknown-5-NZB																																												Y
	Unknown-4																																												Y
	Unknown-3																																												Y
	Unknown-2-NZB?																																												Y
	Unknown-1																																												Y
[truncated: 9 more columns]

## Sheet: Regurgitate Fish_Data
ID	SPP.	Species	Total length (cm)	Standard length (cm)	Fork length (cm)	Total weight (g)	Weight collected (g)	Notes
128	MFB	?	14.9			41	4	no head, shiny/irridescent skin, ID from pictures
131	MFB	?	25.5			205	6	very large, no head, ID from pictures
131	MFB	?	14	12.3		40	3	second fish from 131/different species
145	STG	flying fish	17			45	6	not whole, mushy
										Revised 21/07
