# Supplementary material for: Health status and morphometrics of Galápagos magnificent frigatebirds (Fregata magnificens magnificens) determined by hematology, biochemistry, blood gas, and physical examination
Source: PeerJ. 2024 Dec 6;12:e18609. doi: 10.7717/peerj.18609 (PMC11627087; doi:10.7717/peerj.18609)
Supplement: Supplemental Information 2 — Details of the various parameters from 2022. [file peerj-12-18609-s002.xlsx]

## Sheet: GSB2016_Data
ID iSTAT	Capture time	Spp.	Sex	Reproductive State	Blood Drop Time	Release Time	Handling time	Temperature °C	Heart Rate (bpm)	Respiratory Rate (breaths/min)	BCS	Bill Length (mm)	Bill Depth (mm)	Bill Width (mm)	Tarsus Length (mm)	Wing Length (cm)	Weight (kg)	PCV %	TS (g/dL)	Lactate (mmol/L)	iCa (mmo l/L)	Na (mmo l/L)	K (mmo l/L)	Cl (mmol/L)	TCO2 (mmo l/L)	Glucose (mg/dL)	BUN	CREA	Hematocrite %PCV	Hemoglobine (via Hct) g/dL	Anion gap	Heterophils (%)	Monocytes (%)	Eosinophils (%)	Lymphocytes (%)	Basophils (%)	WBC Estimates	Feathers	Blood Slides	Location	Date	General Observations
MFB 1	11:51:00	MFB	MALE	1 month old chick	11:54:00	12:02:00	00:08:00	32.3 (IR)	400	32	WNL	108.35	25.93	25.88	30.99	26	1.25	58.5	5.7	8.8	1.13	147	4.6	117	21	227	23	20.2	43	14.6	15							N	2	DAPHNE MAJOR	2022-07-06
RBTB 1	14:02:00	RBTB	UNKNOWN		14:05:00	14:13:00	00:08:00		260	30	2	63.6	21.57	12.77	29.68	31.7	0.6																					N	2	DAPHNE MAJOR	2022-07-06	Dead chick, owl nearby
RBTB 2	14:21:00	RBTB	UNKNOWN		14:24:00	14:33:00	00:09:00		230	32	3	59.86	20.78	11.19	29.06	31.5	0.6																					N	2	DAPHNE MAJOR	2022-07-06
NZB 1	14:57:00	NZB	MALE		15:00:00	15:03:00	00:03:00		220	44	3	102.1	36.86	24.26	63.86	45.5	2																					N	2	DAPHNE MAJOR	2022-07-06	Captured twice- released after blood
NZB 2	15:07:00	NZB	FEMALE		15:11:00	15:20:00	00:09:00		330	50	2	102.08	35.42	26.03	61.17	47	1.85																					N	2	DAPHNE MAJOR	2022-07-06
NZB 3	15:26:00	NZB	FEMALE	2 eggs	15:28:00	15:34:00	00:06:00		230	40	2	111.07	33.13	24.25	65.3	49	1.9																					N	2	DAPHNE MAJOR	2022-07-06
NZB 4	15:44:00	NZB	FEMALE	1 egg	15:47:00	15:55:00	00:08:00		340	32		104.54	35.67	25.06	63.43	46.5	2.1																					N	2	DAPHNE MAJOR	2022-07-06	Alone
NZB 5	08:19:00	NZB	MALE		08:21:00	08:28:00	00:07:00		180	30	2	102.15	33.33	24	61.4	46	1.75																					N	2	DAPHNE MAJOR	2022-07-07	Regurgitated 1 fish
NZB 6	08:31:00	NZB	FEMALE	1 egg	08:35:00	08:42:00	00:07:00		220	32		101.57	34.66	25.45	59.97	46	1.9																					N	2	DAPHNE MAJOR	2022-07-07
NZB 7	08:49:00	NZB	FEMALE	Nest building	08:51:00	08:57:00	00:06:00		130	28	2	106.64	34.2	25.33	64.03	48	2.05																					N	2	DAPHNE MAJOR	2022-07-07
NZB 8	09:13:00	NZB	UNKNOWN	Non-breeding	09:15:00	09:24:00	00:09:00		320	24	2	102.97	34.15	23.93	59.51	49	1.8																					N	2	DAPHNE MAJOR	2022-07-07
NZB 9	09:32:00	NZB	MALE	Non-breeding	09:38:00	09:44:00	00:06:00		184	28		104.47	32.65	24.83	61.14	46	1.8																					N	2	DAPHNE MAJOR	2022-07-07
NZB 10	09:57:00	NZB	MALE	1 egg	10:03:00	10:11:00	00:08:00		200	40	2	100.45	32.49	23.5	61.29	45	1.6																					N	2	DAPHNE MAJOR	2022-07-07
RBTB 3	10:19:00	RBTB	UNKNOWN		10:24:00	10:32:00	00:08:00		220	40	3	61.76	21.07	11.27	30.39	31	0.55																					N	2	DAPHNE MAJOR	2022-07-07
RBTB 4	10:32:00	RBTB	UNKNOWN		10:34:00	10:45:00	00:11:00		270	40	3	61.67	20.78	11.76	30.7	31	0.65																					N	2	DAPHNE MAJOR	2022-07-07
RBTB 5	10:49:00	RBTB	UNKNOWN		10:52:00	11:01:00	00:09:00		210	40	3	60.8	21.58	11.55	28.4	31	0.7																					N	2	DAPHNE MAJOR	2022-07-07
RBTB 6	11:06:00	RBTB	UNKNOWN		11:09:00	11:18:00	00:09:00		104	36	3	63.73	19.94	10.72	28.87	31	0.65																					N	2	DAPHNE MAJOR	2022-07-07
RBTB 7	11:23:00	RBTB	UNKNOWN		11:25:00	11:33:00	00:08:00		120	40	2	63.25	20.83	11.45	29.15	30.5	0.55																					N	2	DAPHNE MAJOR	2022-07-07
RBTB 8	11:36:00	RBTB	UNKNOWN	1 chick	11:42:00	11:49:00	00:07:00		104	16	2	61.73	20.5	11.17	26.35	30	0.55																					N	2	DAPHNE MAJOR	2022-07-07
NZB11	13:30:00	NZB	MALE		13:36:00	13:41:00	00:05:00		200	40	2	100.45	32.45	23.99	59.61	44.5	1.65																					N	2	DAPHNE MAJOR	2022-07-07
NZB12	14:02:00	NZB	FEMALE	2 eggs	14:07:00	14:13:00	00:06:00		320	28	2	107.4	35.71	23.21	63.35	46.5	2.1																					N	2	DAPHNE MAJOR	2022-07-07
RBTB 9	14:29:00	RBTB	UNKNOWN	1 egg	14:30:00	14:37:00	00:07:00		260	36	2	64.25	22.6	12.26	29.93	32	0.6																					N	2	DAPHNE MAJOR	2022-07-07
NZB 13	14:54:00	NZB	FEMALE	1 egg	14:56:00	15:06:00	00:10:00		350	36	2	104.42	34.27	24.94	65.61	48	2.6																					N	2	DAPHNE MAJOR	2022-07-07
RBTB 10	15:16:00	RBTB	UNKNOWN	1 chick	15:17:00	15:26:00	00:09:00		300	48	3	60.45	22.39	10.94	29.28	30.5	0.62																					N	2	DAPHNE MAJOR	2022-07-07
RBTB 11	15:28:00	RBTB	UNKNOWN	1 egg	15:31:00	15:38:00	00:07:00		250	32	2	63.45	20.65	11.29	28.2	31	0.5																					N	2	DAPHNE MAJOR	2022-07-07
RBTB 12	15:45:00	RBTB	UNKNOWN	1 egg	15:47:00	15:54:00	00:07:00		230	32	2	60.05	20.75	11.53	29.29	31	0.57																					N	2	DAPHNE MAJOR	2022-07-07
RBTB 13	15:55:00	RBTB	UNKNOWN	1 chick	15:58:00	16:08:00	00:10:00		120	32	2	62.02	20.23	10.89	30.42	31.5	0.6																					N	2	DAPHNE MAJOR	2022-07-07
RBTB 14	16:08:00	RBTB	UNKNOWN	Big chick	16:12:00	16:19:00	00:07:00		200	20	3	62.67	20.19	11.5	29.55	30	0.68																					N	2	DAPHNE MAJOR	2022-07-07
MFB 2	08:43:00	MFB	MALE	Small chick	08:45:00	08:53:00	00:08:00		380	50	2	100.85	22.48	25.37	27.8	65	1	61/63	6	7	1.14	148	4.8	116	21	225	<3	<0.2	46	15.6	17							N	2	SEYMOUR NORTE	2022-07-08
MFB 3	09:20:00	MFB	MALE	1 egg	09:25:00				310	50	4	106.35	25.67	27.91	27.31	64	1.15	48/51	5.9	6.4	1.21	146	5	119	19	262	<3	<0.2	36	12.2	15							N	2	SEYMOUR NORTE	2022-07-08
MFB 4	09:57:00	MFB	FEMALE	6 week old chick	09:57:00		10:05:00		340	40	2	133.55	25.96	28.88	28.86	71	1.3	52/53	4.4	3.1	1.28	147	4.1	113	25	230	<3	<0.2	40	13.6	15							N	2	SEYMOUR NORTE	2022-07-08
MFB 5	10:47:00	MFB	FEMALE	Roosting (likely with chick)	10:50:00				200	50	2	127.69	26.41	29.8	30.94	70.5	1.55	47/47	5.3	6.6	1.24	147	4.2	116	20	264	<3	<0.2	35	11.9	16							N	2	SEYMOUR NORTE	2022-07-08
BFB 1	13:27:00	BFB	MALE	1 egg, naked chick	13:30:00	13:38:00	00:08:00		280	60	2	101.87	29.22	21.49	53.74	43.5	1.4	45/45	7.6	5	1.12	148	3.1	113	20	207	14	0.9	36	12.2	19							N	2	SEYMOUR NORTE	2022-07-08
BFB 2	13:39:00	BFB	MALE	2 chicks	13:43:00	13:50:00	00:07:00		200	40	2	98.88	30.49	1900-01-26 21:36:00	54.33	43.5	1.25	46/46	6	4.4	1.08	145	3.9	122	18	220	<3	<0.2	36	12.2	10							Y	2	SEYMOUR NORTE	2022-07-08
BFB 3	13:53:00	BFB	FEMALE	1 large fluffy chick	13:57:00	14:06:00	00:09:00		320	40	3	104.67	31.2	1900-01-23 08:52:48	59.85	46	1.8	48/47	6	5.6	1.1	146	3.7	112	19	228	7	0.9	38	12.9	20							Y	2	SEYMOUR NORTE	2022-07-08
BFB 4	14:07:00	BFB	FEMALE	2 fluffy chicks	14:12:00	14:19:00	00:07:00		200	40	3	112.89	31.08	22.64	60.92	45	1.8	49/49	6.3	6.4	1.1	147	2.8	114	16	219	<3	0.6	42	14.3	21							Y	2	SEYMOUR NORTE	2022-07-08
BFB 5	14:21:00	BFB	MALE	1 downy chick	14:28:00	14:33:00	00:05:00		170	30	2	105.08	27.57	20.27	55.16	44	1.2	48/48	5.5	3.9	1.11	151	3	110	24	274	20	0.6	37	12.6	20							Y	2	SEYMOUR NORTE	2022-07-08
BFB 6	15:03:00	BFB	FEMALE	2 downy chicks	15:08:00				240	30	2	105.86	30.31	22.5	60.08	44.5	2	38/37	6.4	8.4	1.11	144	4.3	115	19	218	6	0.8	27	9.2	14							Y	2	SEYMOUR NORTE	2022-07-08
BFB 7	15:17:00	BFB	FEMALE	2 fluffy chicks	15:22:00	15:30:00	00:08:00		200	40	2	105.96	27.92	21.41	58.79	44.5	1.55	48/50	6.9	6.9	1.15	147	4.6	121	19	207	4	0.3	37	12.6	13							Y	2	SEYMOUR NORTE	2022-07-08
BFB 8	15:31:00	BFB	MALE	1 fluffy chick	15:35:00	15:41:00	00:06:00		180	30	3	101.42	27.39	21.11	54.85	42.5	1.2	45/52	5.6	5	1.24	147	3.2	116	19	197	6	0.6	37	12.6	16							Y	2	SEYMOUR NORTE	2022-07-08
BFB 9	15:44:00	BFB	MALE	1 fluffy chick	0.658333	15:54:00	00:06:00		190	40	2	104.01	28.53	23.14	57.35	43.5	1.4	45/48	5.9	4	1.04	146	3.5	117	22	204	17	35	35	11.9	12							Y	2	SEYMOUR NORTE	2022-07-08
BFB 10	15:56:00	BFB	MALE	1 downy chick	16:00:00	16:06:00	00:06:00		210	50	3	102.04	25.61	20.53	54.28	42	1.35	56/56	7	6.3	1.02	143	3.3	118	17	198	12	0.8	37	12.6	12							Y	2	SEYMOUR NORTE	2022-07-08
BFB 11	16:08:00	BFB	MALE	1 winged chick	16:13:00	16:21:00	00:08:00		190	50	2	105.94	27.18	22.07	57.83	43	1.5	34/52	5.9	4.6	0.92	148	3.9	114	22	169	10	1	34	11.6	17							Y	2	SEYMOUR NORTE	2022-07-08
BFB 12	08:12:00	BFB	FEMALE	1 fluffy chick	08:15:00	08:21:00	00:06:00		180	50	2	105.78	29.28	22.54	58.07	44	1.85	53/54	5.7	4.1	1.1	145	5.3	118	20	177	3	<0.2	39	13.3	12							Y	2	SEYMOUR NORTE	2022-07-09
BFB 13	08:22:00	BFB	FEMALE	2 downy chicks	08:27:00	08:33:00	00:06:00		250	40	2	102.58	25.99	19.9	56.06	43.5	1.45	46/46	5.5	5.9	1.09	145	4.3	110	22	198	5	0.9	35	11.9	18							Y	2	SEYMOUR NORTE	2022-07-09
BFB 14	08:35:00	BFB	MALE	1 fluffy chick	08:37:00	08:44:00	00:07:00		300	40	2	99.17	26.12	21.75	56.73	42	1.6	51/51	5.9	7.1	1.13	146	4.7	115	21	180	6	0.9	36	12.2	16							Y	2	SEYMOUR NORTE	2022-07-09
BFB 15	08:45:00	BFB	MALE	1 winged chick	08:47:00	08:54:00	00:07:00		210	20	2	105.73	26.92	20.57	57.8	44	1.3	43/44	7.1	3.9	1.4	152	4.5	119	18	222	10	0.2	35	11.9	20							Y	2	SEYMOUR NORTE	2022-07-09
BFB 16	08:55:00	BFB	MALE	2 eggs	09:00:00	09:06:00	00:06:00		120	30	1	101.29	26.98	20.68	49.16	43	1.05	55/55	5.5	2.6	1.15	148	5.6	121	22	173	3	<0.2	41	13.9	12							Y	2	SEYMOUR NORTE	2022-07-09
BFB 17	09:09:00	BFB	MALE	2 downy chicks	09:12:00	09:18:00	00:06:00		270	40	2	109.31	29.09	22.66	62.91	45.5	1.9	39/40	4.9	5.4	1.2	149	2.9	112	24	206	5	1	35	11.9	17							Y	2	SEYMOUR NORTE	2022-07-09
BFB 18	09:21:00	BFB	FEMALE	2 fluffy chicks	09:28:00	09:35:00	00:07:00		320	30	2	103.47	26.65	20.73	58.6	42.5	1.25	42/43	5.7	3.7	1.16	150	3	110	24	217	16	0.7	36	12.2	21							Y	2	SEYMOUR NORTE	2022-07-09
BFB 19	09:38:00	BFB	MALE	1 winged chick	09:40:00	09:47:00	00:07:00		190	30	3	107.51	27.62	20.95	55.37	43	1.4	39/40	5.9	4.6	1.16	148	4.8	118	18	196	6	0.3	31	10.5	18							Y	2	SEYMOUR NORTE	2022-07-09	BANDED D.ANDERSON 0823
BFB 20	09:51:00	BFB	MALE	2 downy chicks	09:54:00	09:59:00	00:05:00		250	30	3	111.85	30.41	21.89	59.17	46	1.7	55/55	5.1	4.9	1.3	150	4.1	119	20	199	<3	<0.2	41	13.9	16							Y	2	SEYMOUR NORTE	2022-07-09	BANDED D.ANDERSON 1061
BFB 21	10:05:00	BFB	FEMALE	1 winged chick	10:07:00	10:14:00	00:07:00		260	30	2	110.99	30.93	22.72	58.5	45.5	1.7	49/50	4.9	5.3	1.2	148	4.5	120	20	203	<3	<0.2	36	12.2	15							Y	2	SEYMOUR NORTE	2022-07-09
BFB 22	10:45:00	BFB	FEMALE	2 downy chicks	10:47:00	10:54:00	00:07:00		200	20	3	109	29.58	21.46	58.5	46	1.75	49/50	5.7	3.4	1.19	149	4.7	119	20	215	<3	<0.2	39	13.3	15							Y	2	SEYMOUR NORTE	2022-07-09
BFB 23	10:59:00	BFB	MALE	2 downy chicks	11:01:00	11:07:00	00:06:00		250	20	3	105.47	29.68	20.67	56.4	44.5	1.25	47/47	5.1	4.2	1.15	149	4.8	121	19	211	<3	<0.2	36	12.2	15							Y	2	SEYMOUR NORTE	2022-07-09
BFB 24	11:10:00	BFB	MALE	2 downy chicks	11:12:00	11:21:00	00:09:00		240	30	3	103.84	26.32	22.42	56.77	43	1.3	50/50	5.5	3.8	1.44	150	3.9	119	19	209	<3	<0.2	38	12.9	16							Y	2	SEYMOUR NORTE	2022-07-09
BFB 25	11:26:00	BFB	FEMALE	2 naked chicks	11:29:00				310	30	4	106.37	28.24	21.78	62.38	46	1.9	49/49	5.5	6.2	1.24	150	3.8	113	19	198	5	1	37	12.6	23							Y	2	SEYMOUR NORTE	2022-07-09
BFB 26	11:40:00	BFB	FEMALE	1 fluffy chick	11:42:00	11:52:00	00:10:00		360	30	4	108.08	30.06	22.84	56.88	43.5	1.9	54/54	5.9	9.6	1.12	148	4.1	118	15	193	4	0.5	41	13.9	20							Y	2	SEYMOUR NORTE	2022-07-09
BFB 27	11:55:00	BFB	MALE	1 chick	11:58:00	12:05:00	00:07:00		350	40	2	100.58	26.58	19.99	54.09	41.5	1.1	49/50	5.5	4.4	1.08	145	3.7	109	25	249	10	0.5	37	12.6	16							Y	2	SEYMOUR NORTE	2022-07-09
BFB 28	12:07:00	BFB	MALE	2 downy chicks	12:10:00	12:18:00	00:08:00		240	30	2	105.7	27.58	20.67	55.88	44	1.3	50	4.9	3.1	1.02	146	3.6	117	19	215	12	0.5	37	12.6	15							Y	2	SEYMOUR NORTE	2022-07-09
BFB 29	12:23:00	BFB	FEMALE	2 downy chicks	12:26:00	12:35:00	00:09:00		280	30	3	106.9	32.41	23.01	61.96	45.5	1.9	53/53	5	6.6	1.24	148	4.3	114	20	186	5	0.8	39	13.3	20							Y	2	SEYMOUR NORTE	2022-07-09
BFB 30	12:39:00	BFB	MALE	1 downy chick	12:40:00	12:47:00	00:07:00		320	30	2	102.49	29.17	21.25	54.98	43	1.25	42/43	5.4	6.7	1.17	146	4.3	115	***	201	10	0.7	30	10.2	***							Y	2	SEYMOUR NORTE	2022-07-09
MFB 6	12:53:00	MFB	FEMALE	1 chick <6 weeks	12:56:00	13:03:00	00:07:00		400	40	3	134.03	26.41	29.85	27.7	69	1.4	55/55	4.1	3.7	0.97	145	2.2	111	24	202	<3	<0.2	42	14.3	14							N	2	SEYMOUR NORTE	2022-07-09
